# Supplementary material for: Proneurotrophin-3 promotes cell cycle withdrawal of developing cerebellar granule cell progenitors via the p75 neurotrophin receptor
Source: eLife. 2016 Jul 19;5:e16654. doi: 10.7554/eLife.16654 (PMC4975574; doi:10.7554/eLife.16654)
Supplement: Figure 3—source data 1. — DOI: http://dx.doi.org/10.7554/eLife.16654.007 [file elife-16654-fig3-data1.xlsx]

## Sheet: FIG 3C EdU
Fig 3C EdU Counting
Num of mouse	WT p7	p75 -/- p7	WT p10	p75 -/- p10	WT p14	p75 -/- p14		One-way analysis of variance
1	0.2346	0.2612	0.1753	0.2751	0.12	0.2189		P value	< 0.0001
2	0.2099	0.2655	0.1908	0.2984	0.0952	0.2624		P value summary	***
3	0.1546	0.3014	0.1799	0.2205	0.0625	0.2605		Are means signif. different? (P < 0.05)	Yes
4	0.2143	0.24				0.2081		Number of groups	6
								F	16.12
								R square	0.8431

## Sheet: Fig 3e Ki67
	Fig 3e Ki67 Counting
Num of mouse	p2 wt	p2 ko	p5 wt	p5 ko	p7 wt	p7 ko	p10 wt	p10 ko	p14 wt	p14 ko		One-way analysis of variance
1	0.783784	0.757	0.61	0.6203	0.3516	0.5344	0.24	0.46	0.321	0.35		P value	< 0.0001
2	0.652918	0.798	0.5031	0.5557	0.1667	0.4422	0.33	0.53	0.229	0.39		P value summary	***
3	0.616438	0.687	0.6207	0.5527	0.3713	0.4074	0.041	0.4789	0.248	0.46		Are means signif. different? (P < 0.05)	Yes
4	0.584959	0.721		0.4808	0.2536	0.4133	0.07		0.225			Number of groups	10
					0.3388	0.3835			0.16			F	27.63
					0.375	0.4146			0.225			R square	0.8797
									0.088

## Sheet: Fig 3g CBL size
Fig 3g CBL size
P5 wt	P5 KO	P7 wt	P7 KO	P10 wt	P10 KO		T test P5			T test P7			T test P10
0.048785	0.069296	0.074343	0.118284	0.100057	0.105326		Table Analyzed	Area in mm WT vs KO		Table Analyzed	Area in mm WT vs KO		Unpaired t test
0.054518	0.068207	0.07573	0.088265	0.083032	0.110881		Column A	P5 wt		Column C	P7 wt		P value	0.0174
0.052244	0.058025	0.085083	0.083613	0.065696	0.126671		vs	vs		vs	vs		P value summary	*
	0.043754	0.071469	0.09218	0.100486	0.109486		Column B	P5 KO		Column D	P7 KO		Are means signif. different? (P < 0.05)	Yes
		0.077898	0.085723	0.099427	0.109875								One- or two-tailed P value?	Two-tailed
				0.100874	0.103239		Unpaired t test			Unpaired t test			t, df	t=2.844 df=10
							P value	0.3156		P value	0.038
							P value summary	ns		P value summary	*		How big is the difference?
							Are means signif. different? (P < 0.05)	No		Are means signif. different? (P < 0.05)	Yes		Mean ± SEM of column E	0.09160 ± 0.005894 N=6
							One- or two-tailed P value?	Two-tailed		One- or two-tailed P value?	Two-tailed		Mean ± SEM of column F	0.1109 ± 0.003374 N=6
							t, df	t=1.115 df=5		t, df	t=2.481 df=8		Difference between means	-0.01932 ± 0.006791
													95% confidence interval	-0.03445 to -0.004186
							How big is the difference?			How big is the difference?			R square	0.4472
							Mean ± SEM of column A	0.05185 ± 0.001667 N=3		Mean ± SEM of column C	0.07690 ± 0.002295 N=5
							Mean ± SEM of column B	0.05982 ± 0.005926 N=4		Mean ± SEM of column D	0.09361 ± 0.006331 N=5		F test to compare variances
							Difference between means	-0.007972 ± 0.007150		Difference between means	-0.01671 ± 0.006734		F,DFn, Dfd	3.051, 5, 5
							95% confidence interval	-0.02635 to 0.01041		95% confidence interval	-0.03224 to -0.001180		P value	0.2462
							R square	0.1991		R square	0.4349		P value summary	ns
													Are variances significantly different?	No
							F test to compare variances			F test to compare variances
							F,DFn, Dfd	16.86, 3, 2		F,DFn, Dfd	7.608, 4, 4
							P value	0.113		P value	0.0747
							P value summary	ns		P value summary	ns
							Are variances significantly different?	No		Are variances significantly different?	No
