# Supplementary material for: Proneurotrophin-3 promotes cell cycle withdrawal of developing cerebellar granule cell progenitors via the p75 neurotrophin receptor
Source: eLife. 2016 Jul 19;5:e16654. doi: 10.7554/eLife.16654 (PMC4975574; doi:10.7554/eLife.16654)
Supplement: Figure 4—source data 1. — DOI: http://dx.doi.org/10.7554/eLife.16654.009 [file elife-16654-fig4-data1.xlsx]

## Sheet: Fig4A NGF
	Fig 4A
			NGF 20ng/ml		NGF 100ng/ml
	ctrl	shh	ctrl	shh	ctrl	shh		One-way analysis of variance
Exp.t 1	1.17082	1.47	1.06	1.62	1.04	1.61		P value	< 0.0001
Exp.t 2	0.971661	1.45	0.9	1.41	0.69	0.98		P value summary	***
Exp.t 3	1.37045	1.37	1.04	1.36	0.89	1.29		Are means signif. different? (P < 0.05)	Yes
Exp.t 4	1.00868	1.26	1	1.28	1	1.28		Number of groups	6
Exp.t 5	0.788233	1.3	1.06	1.36	1.13	1.37		F	7.301
Exp.t 6	0.690162	1.52	0.93	1.34	0.94	1.35		R square	0.5105
Exp.t 7		1.91	1.19	1.55	1.11	2.36

## Sheet: Fig 4B BDNF
	Fig 4B BDNF
			BDNF 20ng/ml		BDNF 100ng/ml
	ctrl	shh	ctrl	shh	ctrl	shh
Expt. 1	1.17	1.47	1.52	2.16	0.89	1.26		ANOVA summary
Expt.2	0.97	1.45	0.84	1.27	1.07	1.36		F	5.759
Expt. 3	1.37	1.57	1.14	1.69	1.17	1.89		P value	0.001
Expt. 4	1.01	1.66	0.92	1.24				P value summary	***
Expt. 5	0.79	1.46	1.06	1.3				Are differences among means statistically significant? (P < 0.05)	Yes
Expt. 6	0.69	1.59	0.84	1.21				R square	0.5161
Expt. 7		1.4	1.18	1.75

## Sheet: Fig 4C NT-3
	Fig 4C NT-3
			NT3 20ng/ml		NT3 100ng/ml
	ctrl	shh	ctrl	shh	ctrl	shh		ANOVA summary
Expt. 1	1.17	1.47	1.03	1.37	1.07	1.61		F	9.794
Expt. 2	0.97	1.45	0.88	0.93	0.78	1.13		P value	< 0.0001
Expt. 3	1.37	1.37	0.9	1.24	0.97	1.31		P value summary	****
Expt. 4	1.01	1.26	1.03	1.22	0.99	1.2		Are differences among means statistically significant? (P < 0.05)	Yes
Expt. 5	0.79	1.3	1.01	1.38	1.09	1.45		R square	0.5504
Expt. 6	0.69	1.52	1	1.51	0.81	1.36
Expt. 7		1.91	1.49	1.69	1.15	1.65
Expt. 8		1.4	0.98	1.48	0.8	1.47

## Sheet: Fig 4C NT-4
	Fig 4C NT-4
			NT4 20ng/ml		NT4 100ng/ml
	ctrl	shh	ctrl	shh	ctrl	shh		One-way analysis of variance
Expt. 1	1.17	1.66	0.83	1.28	1.1	1.26		P value	0.0011
Expt. 2	0.97	1.46	1.08	1.28	1.04	1.33		P value summary	**
Expt. 3	1.37	1.59	1.01	1.38	1.08	1.32		Are means signif. different? (P < 0.05)	Yes
Expt. 4	1.01	1.4	0.85	1.35	0.07	0.85		Number of groups	6
Expt. 5	0.79		0.81	1.38	0.86	1.32		F	5.896
								R square	0.5512
