# Supplementary material for: Proneurotrophin-3 promotes cell cycle withdrawal of developing cerebellar granule cell progenitors via the p75 neurotrophin receptor
Source: eLife. 2016 Jul 19;5:e16654. doi: 10.7554/eLife.16654 (PMC4975574; doi:10.7554/eLife.16654)
Supplement: Figure 5—source data 1. — DOI: http://dx.doi.org/10.7554/eLife.16654.011 [file elife-16654-fig5-data1.xlsx]

## Sheet: Fig 5a proNGF
Fig 5a proNGF
			proNGF 4ng/ml		proNGF 8ng/ml
EXP	ctrl	shh	ctrl	shh	ctrl	shh		ANOVA summary
1	1.17	1.57	1.22	1.48	1.3	1.71		F	15.02
2	0.97	1.66	1.05	1.52	1.01	1.45		P value	< 0.0001
3	1.01	1.46	1.02	1.45	1.02	1.63		P value summary	****
								Are differences among means statistically significant? (P < 0.05)	Yes
								R square	0.8622

## Sheet: Fig5a proBDNF
Fig 5b proBDNF
			proBDNF 4ng/ml		proBDNF 8ng/ml
EXP	ctrl	shh	ctrl	shh	ctrl	shh		One-way analysis of variance
1	1.17	1.47	0.806794	1.20845	1.09625	1.15428		P value	< 0.0001
2	0.97	1.45	0.917197	1.21114	0.877808	1.28309		P value summary	***
3	1.37	1.57	0.973046	1.39353	0.859838	1.19462		Are means signif. different? (P < 0.05)	Yes
4	1.01	1.66	0.931716		0.862534	1.38446		Number of groups	6
5	0.79	1.46	0.887691					F	17.14
6	0.69	1.59	0.858041					R square	0.8298

## Sheet: Fig 5a proNT3
Fig 5b proNT3
			proNT3 4ng/ml		proNT3 8ng/ml
EXP	ctrl	shh	ctrl	shh	ctrl	shh		One-way analysis of variance
1	1.17	1.47	0.699877	1.13653	1.05	1.26		P value	0.0008
2	0.97	1.45	1.32182	1.13344	1.059	1.08		P value summary	***
3	1.37	1.57	0.8778	1.14939	1.15	1.059		Are means signif. different? (P < 0.05)	Yes
4	1.01	1.66		1.34839				Number of groups	6
5	0.79	1.46						F	6.91
6	0.69	1.59						R square	0.6452

## Sheet: Fig 5b proNT3
	Fig 5b proNT3
EXP	ctrl	shh	shh+pNT3	pNT3		ANOVA summary
1	0.159333	0.3761	0.268167	0.3082		F	9.796
2	0.165	0.438367	0.2695	0.1514		P value	0.0047
3	0.129267	0.47	0.12375	0.14385		P value summary	**
						Are differences among means statistically significant? (P < 0.05)	Yes
						R square	0.786

## Sheet: Fig 5c anti-proNT3
	Fig 5c proNT3
EXP	ctrl	shh	shh+proNT-3	shh+anti pNT3	shh+pNT-3+anti pNT3		ANOVA summary
1	1.03	1.63	0.87	1.4	1.22		F	10.65
2	0.93	1.44	0.91	1.29	1.31		P value	0.0013
3	0.96	1.66	1.13	1.39	1.7		P value summary	**
							Are differences among means statistically significant? (P < 0.05)	Yes
							R square	0.8099
