# Supplementary material for: Proneurotrophin-3 promotes cell cycle withdrawal of developing cerebellar granule cell progenitors via the p75 neurotrophin receptor
Source: eLife. 2016 Jul 19;5:e16654. doi: 10.7554/eLife.16654 (PMC4975574; doi:10.7554/eLife.16654)
Supplement: Figure 6—source data 1. — DOI: http://dx.doi.org/10.7554/eLife.16654.015 [file elife-16654-fig6-data1.xlsx]

## Sheet: Fig 6a Wt vs KO
	Fig 6a WT vs KO
	ctrl wt	ctrl ko	shh wt	shh ko	pNT3 wt	pnt3 ko	shh+pNT3 wt	shh+pNT3 ko		ANOVA summary
Expt. 1	1.15566	0.84	1.58	2.12	1.27	1.3	1.43	1.73		F	11.16
Expt. 2	0.84434	0.99	1.64765	1.62	0.88	0.79	0.97	1.69		P value	< 0.0001
Expt. 3	1	1.11	1.61	1.84	0.97	1.14	1.11	1.65		P value summary	****
										Are differences among means statistically significant? (P < 0.05)	Yes
										R square	0.83

## Sheet: Fig 6C Anti-SorCS2
	Fig 6C anti-SorCS2
	ctrl	shh	shh + pNT3	shh + pNT3 + SorCS2	proNT3	pNT3 + a SorCS2	SorCS2	shh + SorCS2
Expt. 1	0.993113	1.52449	0.789331	1.6999	0.904368	0.835762	1.01633	1.71796		ANOVA summary
Expt. 2	1.04986	1.63025	0.779013	1.58382	0.899646	0.768695	1.02665	1.56061		F	54.52
Expt. 3	0.957	1.55803	0.884773	1.30781	0.948052	0.913148	1.12467	1.82888		P value	< 0.0001
Expt. 4		1.50386		1.3981		0.933784	1.0705	1.74375		P value summary	****
										Are differences among means statistically significant? (P < 0.05)	Yes
										R square	0.9478
