# Supplementary material for: Proneurotrophin-3 promotes cell cycle withdrawal of developing cerebellar granule cell progenitors via the p75 neurotrophin receptor
Source: eLife. 2016 Jul 19;5:e16654. doi: 10.7554/eLife.16654 (PMC4975574; doi:10.7554/eLife.16654)
Supplement: Figure 8—source data 1. — DOI: http://dx.doi.org/10.7554/eLife.16654.019 [file elife-16654-fig8-data1.xlsx]

## Sheet: Fig 8c WT vs KO
	Fig 8c Mean gray value WT vs KO
Mouse #	WT	KO		Table Analyzed	P14 Mean grey
1	1700.38	3001.52
2	766.47	3309.59		Column B	KO
3	1203.49	2484.02		vs.	vs.
4	769.04	2119.3		Column A	WT
5	758.94	1579.67
6	535.49	2010.49		Unpaired t test
7	2016.34			P value	0.0024
				P value summary	**
				Significantly different? (P < 0.05)	Yes
				One- or two-tailed P value?	Two-tailed
				t, df	t=3.923 df=11

## Sheet: Fig 8e HDAC1 WB
	Fig 8E HDAC1 WB
	ctrl	proNT3	shh	shh + 1h pNT3	shh + 2h pNT3
Expt 1	0.76		1.83	1.41	0.99		ANOVA summary
Expt 2	0.69		2.21	1.12			F	5.339
Expt 3	0.75		1.19	0.78			P value	0.0034
Expt 4	1.21	1.09	1.67	1.21			P value summary	**
Expt 5	1.5	1.53		0.58			Are differences among means statistically significant? (P < 0.05)	Yes
Expt 6	1.04	1.04	1.26	1.34	1.5		R square	0.4815
Expt 7	0.33		3.4		1.01
Expt 8	0.72		2.16		0.44

## Sheet: Fig 8g RT-PCR
	Fig 8f RT-PCR
	ctrl	shh (24 hs)	shh+proNT-3 (24hs)		ANOVA summary
Expt. 1	1	56.038	26.4464		F	58.08
Expt. 2	1	60.408	38.7198		P value	0.004
					P value summary	**
					Are differences among means statistically significant? (P < 0.05)	Yes
					R square	0.9748
