# Supplementary material for: Proneurotrophin-3 promotes cell cycle withdrawal of developing cerebellar granule cell progenitors via the p75 neurotrophin receptor
Source: eLife. 2016 Jul 19;5:e16654. doi: 10.7554/eLife.16654 (PMC4975574; doi:10.7554/eLife.16654)
Supplement: Figure 9—source data 1. — DOI: http://dx.doi.org/10.7554/eLife.16654.021 [file elife-16654-fig9-data1.xlsx]

## Sheet: Fig 9B Ki67
	Fig 9B Ki67
Mouse number	WT p7	p75 -/- p7	p75 fl/fl;Atoh1cre P7	WT p10	p75 -/- p10	p75 fl/fl;Atoh1cre P10	WT p14	p75 -/- p14	p75 fl/fl;Atoh1cre P14		One-way analysis of variance
1	0.3516	0.5344	0.3642	0.42	0.56	0.507	0.229	0.35	0.47191		P value	< 0.0001
2	0.1667	0.4422	0.4793	0.33	0.53	0.58	0.248	0.39	0.443299		P value summary	***
3	0.3713	0.4074	0.4477	0.041	0.4789	0.601	0.225	0.46	0.3566		Are means signif. different? (P < 0.05)	Yes
4	0.2536	0.4133	0.5335	0.07			0.16				Number of groups	9
5	0.3388	0.3835	0.5366				0.225				F	10.27
6		0.4146	0.5901				0.088				R square	0.7325

## Sheet: Fig 9C EdU
	Fig 9C EdU
Mouse number	WT p7	p75 -/- p7	p75 fl/fl;Atoh1cre P7	WT p10	p75 -/- p10	p75 fl/fl;Atoh1cre P10	WT p14	p75 -/- p14	p75 fl/fl;Atoh1cre P14
1	0.2346	0.2655	0.274295	0.1753	0.2751	0.2742	0.12	0.2189	0.1587		P value	< 0.0001
2	0.2099	0.3014	0.30625	0.1908	0.2984	0.3156	0.0952	0.2624	0.1806		P value summary	***
3	0.1546	0.26	0.292958	0.1799	0.2705	0.2854	0.0625	0.2605	0.2111		Are means signif. different? (P < 0.05)	Yes
4	0.2143		0.238364			0.237		0.2081			Number of groups	9
5			0.256305								F	17.61
6			0.235798								R square	0.8544
