# Supplementary material for: Proneurotrophin-3 promotes cell cycle withdrawal of developing cerebellar granule cell progenitors via the p75 neurotrophin receptor
Source: eLife. 2016 Jul 19;5:e16654. doi: 10.7554/eLife.16654 (PMC4975574; doi:10.7554/eLife.16654)
Supplement: Figure 10—source data 1. — DOI: http://dx.doi.org/10.7554/eLife.16654.023 [file elife-16654-fig10-data1.xlsx]

## Sheet: Fig 10A
	Fig 10A CBL size adults
Mouse number	WT	p75 -/-	p75fl/fl; Atoh 1cre		One-way analysis of variance
1	0.0025	0.0039	0.0028		P value	0.0003
2	0.003	0.0031	0.0036		P value summary	***
3	0.0029	0.0035	0.0033		Are means signif. different? (P < 0.05)	Yes
4	0.0033	0.0038	0.0038		Number of groups	3
5	0.0028	0.0042	0.0029		F	9.989
6	0.0033	0.0036			R square	0.3172
7	0.0028	0.0031
8	0.0032	0.0025
9	0.003	0.0028
10	0.0022	0.0026
11	0.0025	0.0038
12	0.0024	0.0032
13	0.0027	0.0032
14	0.0032	0.0039
15	0.003	0.0036
16	0.0026	0.0038
17	0.0022	0.0034
18	0.0022	0.0031
19	0.0027	0.0037
20		0.0026
21		0.0028
22		0.0037

## Sheet: Fig 10B
						WT
	rpm	mouse 1	mouse 2	mouse 3	mouse 4	mouse 5	mouse 6	mouse 7	mouse 8	mouse 9	mouse 10	mouse 11	mouse 12	mouse 13	mouse 14	mouse 15	mouse 16	mouse 17	mouse 18	mouse 19	mouse 20	mouse 21	mouse 22	mouse 23
	10	60	60	60	60	60	60	60	60	60	60	60	60	60	60	60	60	60	60	60	60	60	60	60
	15	60	60	47.5	60	60	60	60	60	60	60	60	60	60	51	60	40	60	60	60	60	60	59	60
	20	60	60	53.5	53	60	60	50	60	59	60	60	39	60	60	45	60	60	47	59.5	60	60	48	50
	25	51.5	60	38	60	60	60	60	60	60	60	60	33	57.5	27	57.5	60	60	32	46.5	33.5	49	24	56
	30	40.5	41.5	5.5	15.5	60	42	9.5	52.5	60	60	60	37	60	27.5	43	59	39	17.5	53	35.5	41	10	59.5
	35	45	21.5	3.5	9	58.5	36.5	8	23.5	60	60	27	13.5	45.5	4	24	53.5	18.5	7.5	41	18	37.5	8	45.5
	40		40	2	11	42	22.5	2.5	25	34.5	47	22	23.5	11	5	28	27.5	21.5	5	28	9	15	6	27
	p75fl/fl; Atoh1 cre
	rpm	mouse 1	mouse 2	mouse 3	mouse 4	mouse 5	mouse 6	mouse 7	mouse 8	mouse 9	mouse 10	mouse 11
	10	60	60	60	60	60	60	60	60	60	60	44				Two-way ANOVA
	15	40	47.5	56	31.5	59	60	60	60	60	60	52
	20	33.5	48.5	14	18.5	42.5	50	24.5	60	60	58.5	33				Source of Variation	% of total variation	P value
	25	34	12	22.5	14	6.5	16	13.5	60	53.5	54	20				Interaction	4.59	< 0.0001
	30	28.5	11.5	6.5	5	20	9	4	28.5	42.5	55	8.5				Column Factor	20.34	< 0.0001
	35	2	5	5.5	2.5	8.5	8	1.5	11.5	29	16	8				Row Factor	50.17	< 0.0001
	40	9	1.5	7	3	4	5.5	1	2	21	9.5	2
	Ngfr -/-
	rpm	mouse 1	mouse 2	mouse 3	mouse 4	mouse 5	mouse 6	mouse 7	mouse 8	mouse 9	mouse 10	mouse 11	mouse 12
	10	23	57.5	60	60	60	56.5	39	60	60	60	60	57
	15	16.5	41	60	56	46.5	34	18.5	60	48.5	51	51.5	49
	20	26.5	5	28	20	13.5	41.5	7.5	55	21	18.5	26	11
	25	4	2	16.5	17.5	12.5	14.5	5.5	33	10.5	18.5	18.5	12.5
	30	1.5	1	5	8	7.5	6	2.5	4	2	8	11.5	4.5
	35	1.5	1	2	3	3.5	1.5	2.5	4	1.5	2.5	2	1.5
	40	3.5	1	1.5	1	5	1	1	2.5	1	1	1	2
